# Supplementary material
Source: PubMed Central journal article supplement (PMC3231968)
Supplement: 11-8246_z7g999112232sf01.pdf [file 11-8246_z7g999112232sf01.pdf]

Figure S1

A.

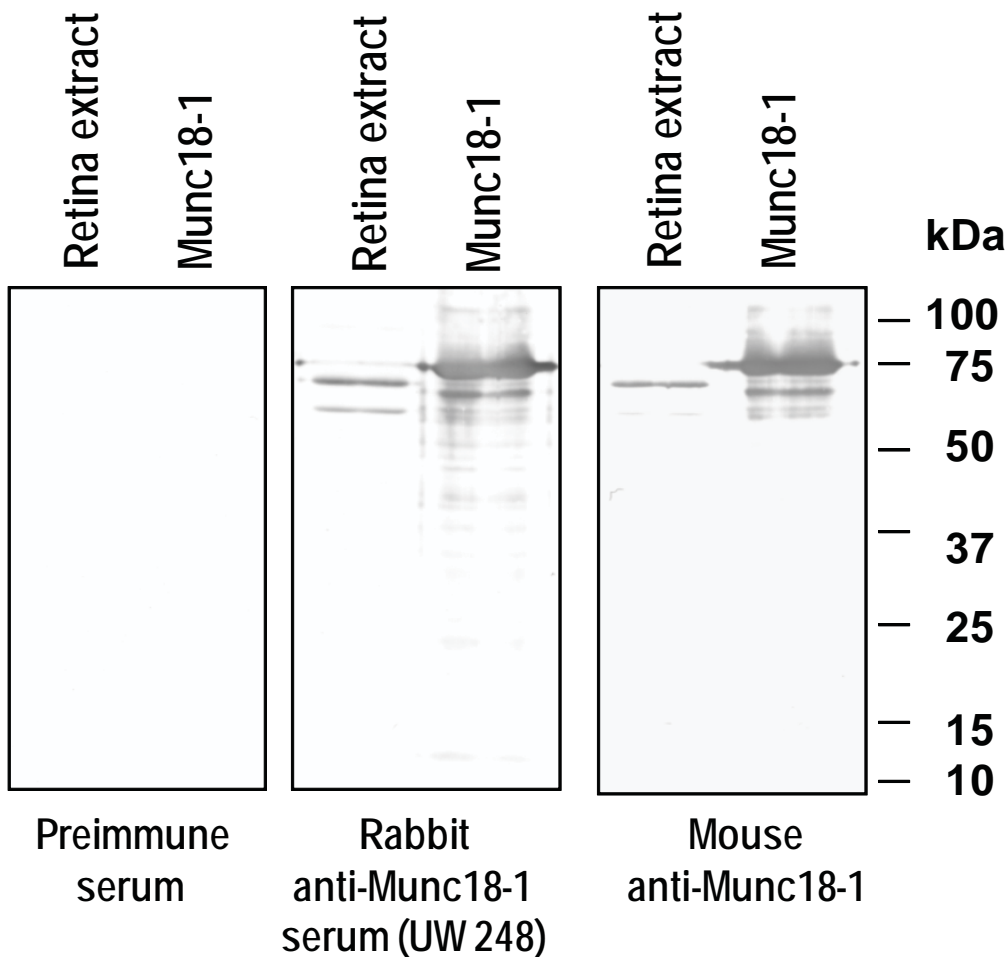

B.

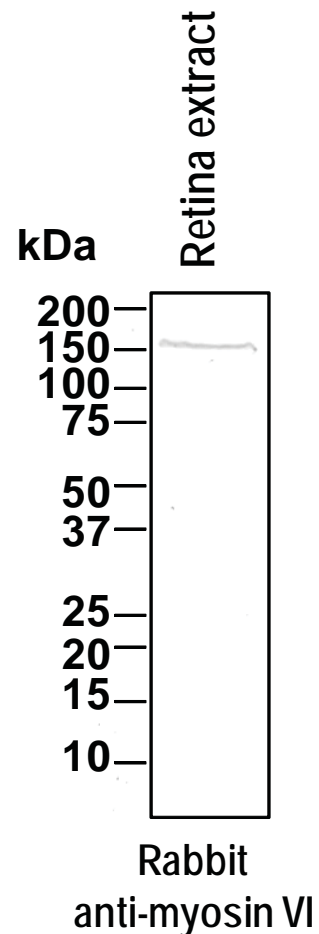

**Figure S1. Characterization of the specificity of anti-Munc18-1 and anti-myosin VI antibodies. A. Characterization of rabbit anti-Munc18-1 generated in this study.** Retinal extracts and recombinant 6His tagged-Munc18-1 expressed and purified from bacteria were separated on SDS-PAGE gels. Proteins were then analyzed by Western blot with the new anti-Munc18-1 serum and the preimmune serum and compared to the commercially available anti-Munc18 mouse monoclonal. Both the commercial and novel anti-Munc18-1 detect in a retinal extract one major bands of ~70 kDa that corresponds to the calculated molecular weight of Munc18-1 and a minor band of ~60 kDa. One major and one minor band were also observed for the 6His-tagged recombinant proteins and that run at ~75 kDa and ~65 kDa. The faint lower MW band being detected in retinal extract and with bacterially purified proteins is likely a degradation product of Munc18. Controls in which the primary antibody was replaced with the preimmune serum do not show any signal. **B. Characterization of rabbit anti-myosin VI.** Retinal extracts were subjected to Western blotting with the commercially available anti-myosin VI rabbit polyclonal. The commercial anti-myosin VI detects one specific band of ~150 kDa which corresponds to the predicted molecular weight of myosin VI.
